# Supplementary material for: Enhanced Energy Storage Performance of PVDF-Based Composites Using BN@PDA Sheets and Titania Nanosheets
Source: MDPI journal article supplement (doi:10.3390/ma15134370), 2022-06-21
Supplement: s1 [file s1]

# Supplementary Material

## **Enhanced energy storage performance of PVDF based composites using BN@PDA sheets and titania nanosheets**

Congcong Zhu<sup>1,2</sup>, Jinghua Yin<sup>1,2,\*</sup>, Yu Feng<sup>2</sup>, Jialong Li<sup>3</sup>, Yanpeng Li<sup>1</sup>, He Zhao<sup>2</sup>, Dong Yue<sup>1</sup> and Xiaoxu Liu<sup>3,\*\*</sup>

<sup>1</sup> School of Materials Science and Chemical Engineering, Harbin University of Science and Technology, Harbin 150080, P. R. China.

<sup>2</sup> Key Laboratory of Engineering Dielectrics and Its Application, Ministry of Education, Harbin University of Science and Technology, Harbin 150080, P. R. China.

<sup>3</sup> School of Materials Science and Engineering, Shaanxi University of Science and Technology, Xi'an, 710021, China.

Correspondence to: \*E-mail: [yinjinghua1@126.com](mailto:yinjinghua1@126.com), \*\*E-mail: [xiaoxuli@ust.edu.cn](mailto:xiaoxuli@ust.edu.cn)

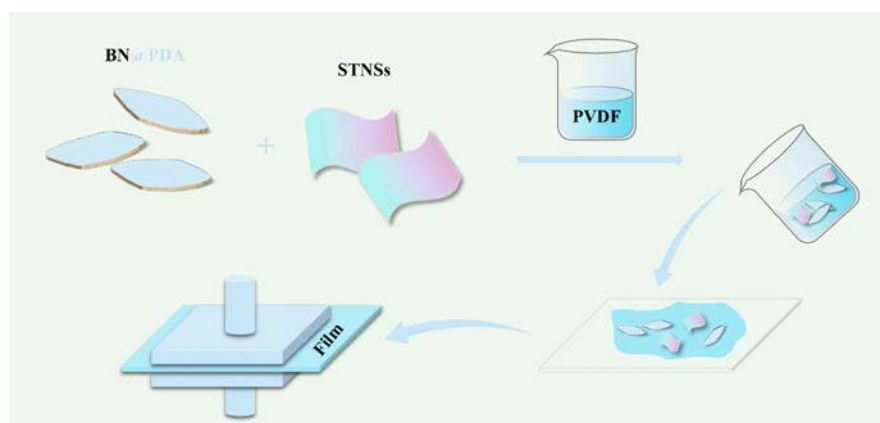

**Figure S1.** Schematic illustration of synthesizing the PVDF/BN@PDA-STNSs composites.

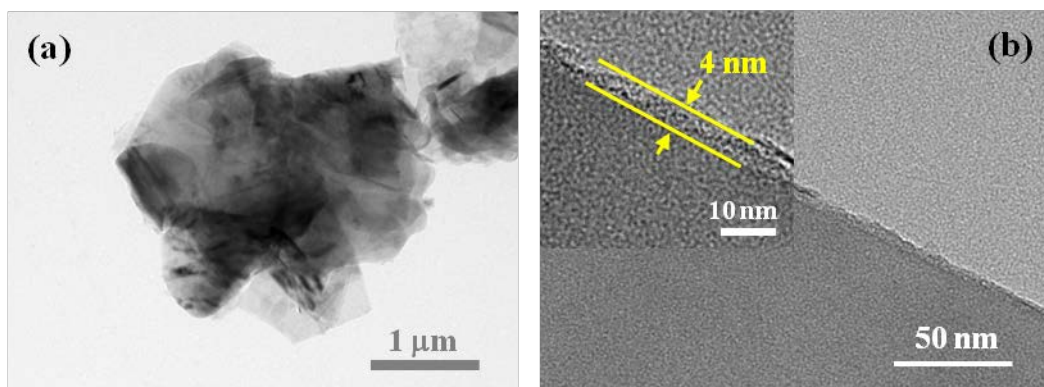

**Figure S2.** (a) Low power TEM image and (b) high power TEM image of 2D BN@PDA sheets.

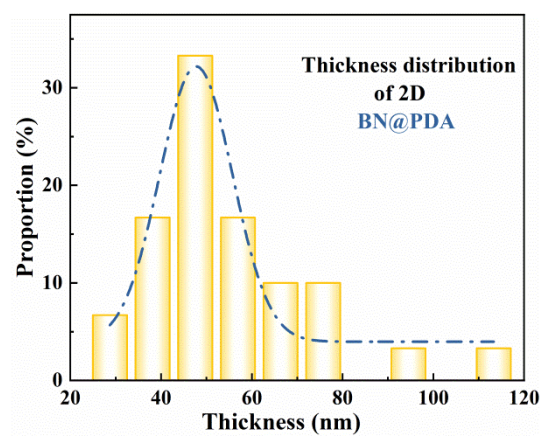

**Figure S3.** The thickness distribution of 2D BN@PDA sheets.

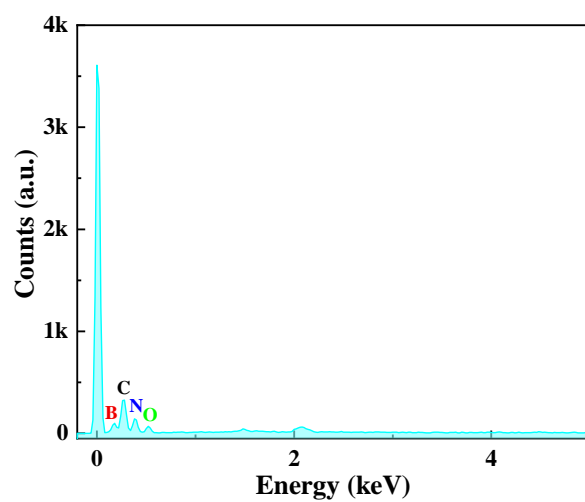

**Figure S4.** The EDS spectrum of BN@PDA.

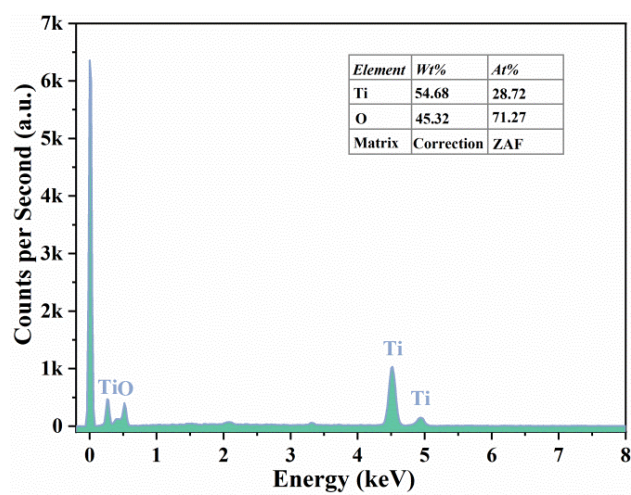

**Figure S5.** The EDS spectrum of STNSs.

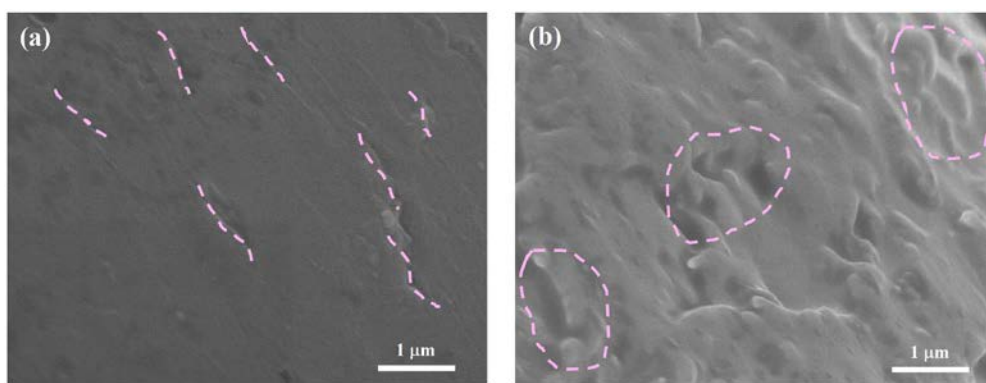

**Figure S6.** Cross-section morphology of the (a) 3 wt% and (b) 10 wt% PVDF/BN@PDA composite.

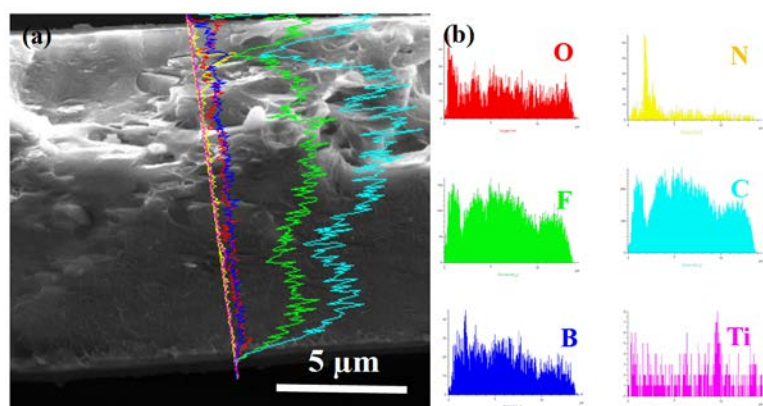

**Figure S7.** (a) Cross-section morphology and (b) mapping of 3 wt% PVDF/BN-STNSs composite.



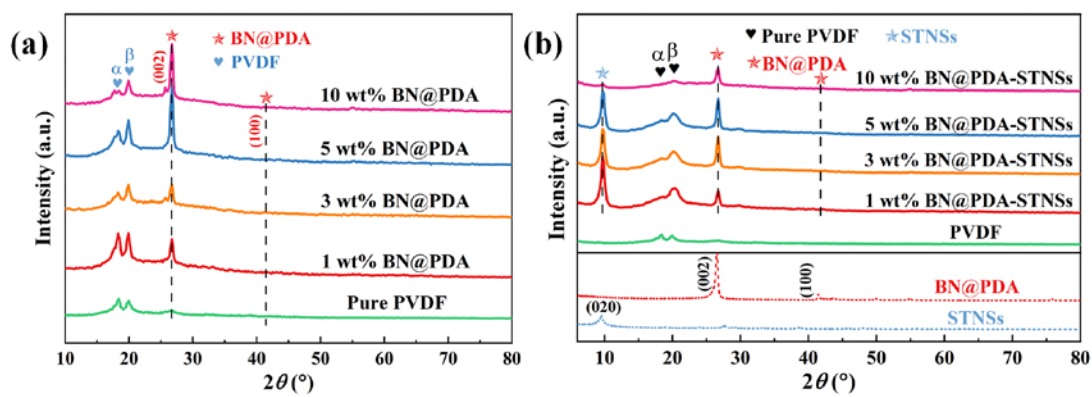

**Figure S8.** The XRD patterns of (a) PVDF/BN@PDA and (b) PVDF/BN@PDA-STNSs composites.

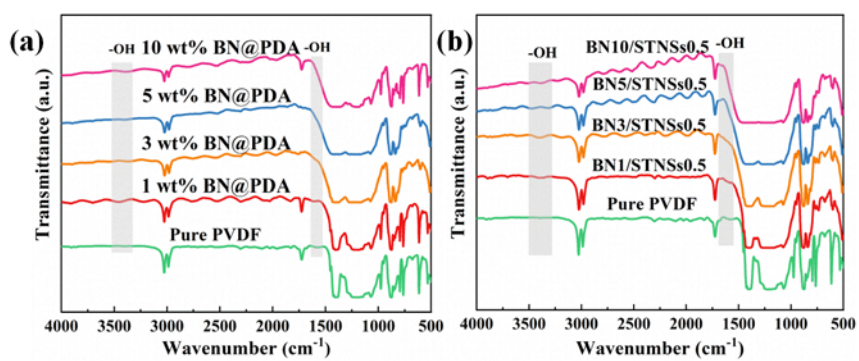

**Figure S9.** FTIR spectra of (a) PVDF/BN@PDA and (b) PVDF/BN@PDA-STNSs composites.

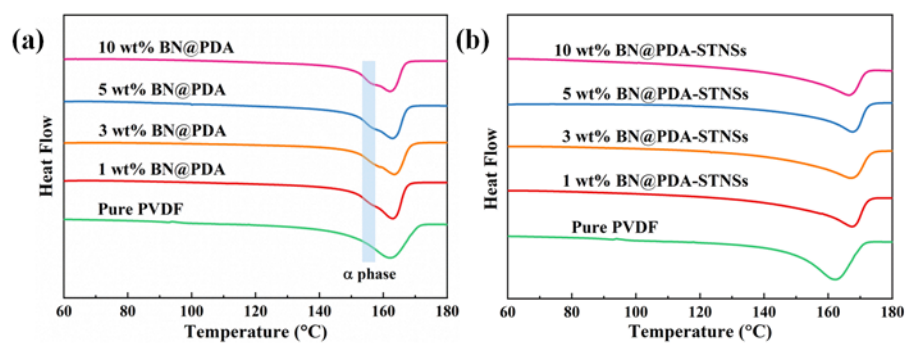

**Figure S10.** The DSC endothermic curves of (a) PVDF/BN@PDA and (b) PVDF/BN@PDA-STNSs composites.

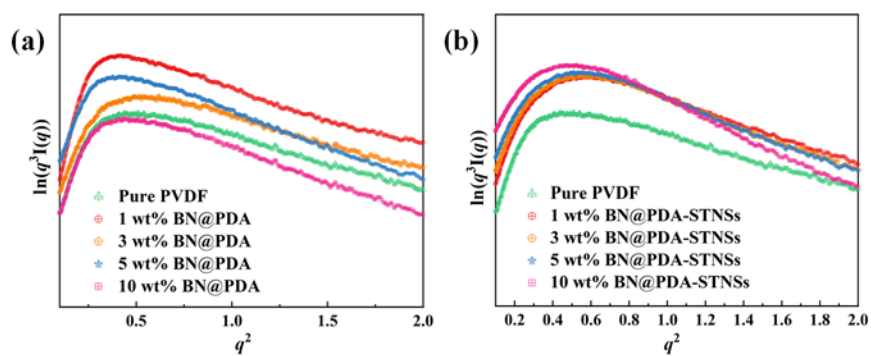

**Figure S11.** Porod curves of (a) PVDF/BN@PDA and (b) PVDF/BN@PDA-STNSs composites.

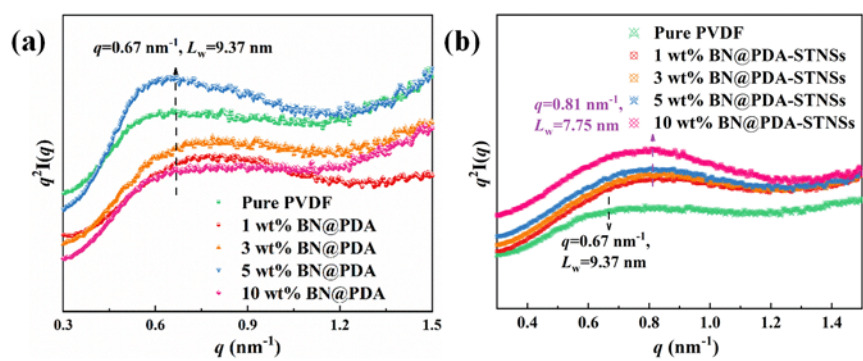

**Figure S12.** Lorentz corrected SAXS profiles of (a) PVDF/BN@PDA and (b) PVDF/BN@PDA-STNSs composites.

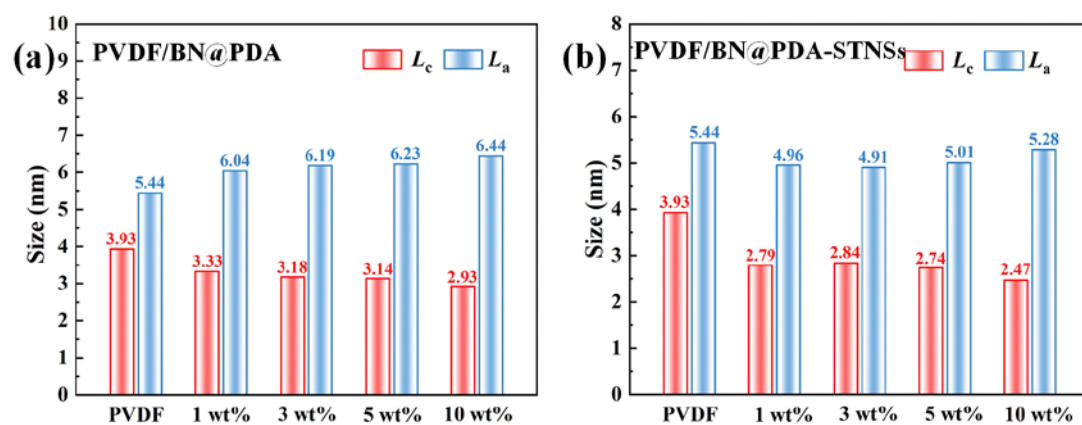

**Figure S13.** The  $L_c$  and  $L_a$  of (a) PVDF/BN@PDA and (b) PVDF/BN@PDA-STNSs composites.

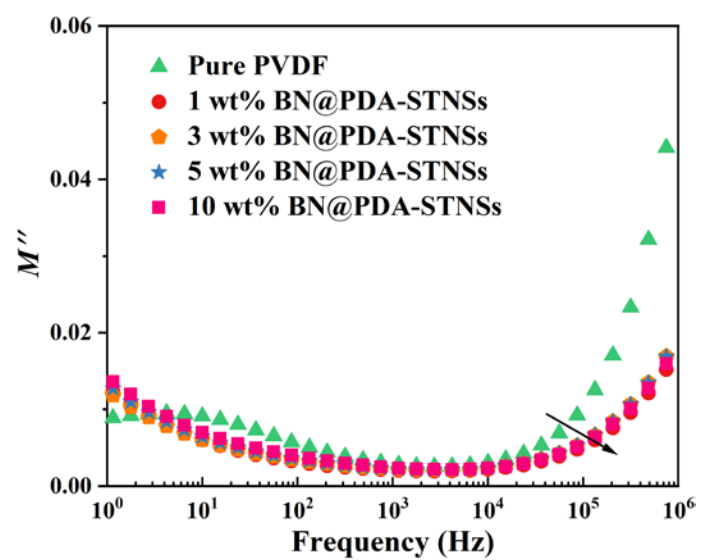

**Figure S14.**  $M''$  of the PVDF/BN@PDA-STNSs ternary composites.

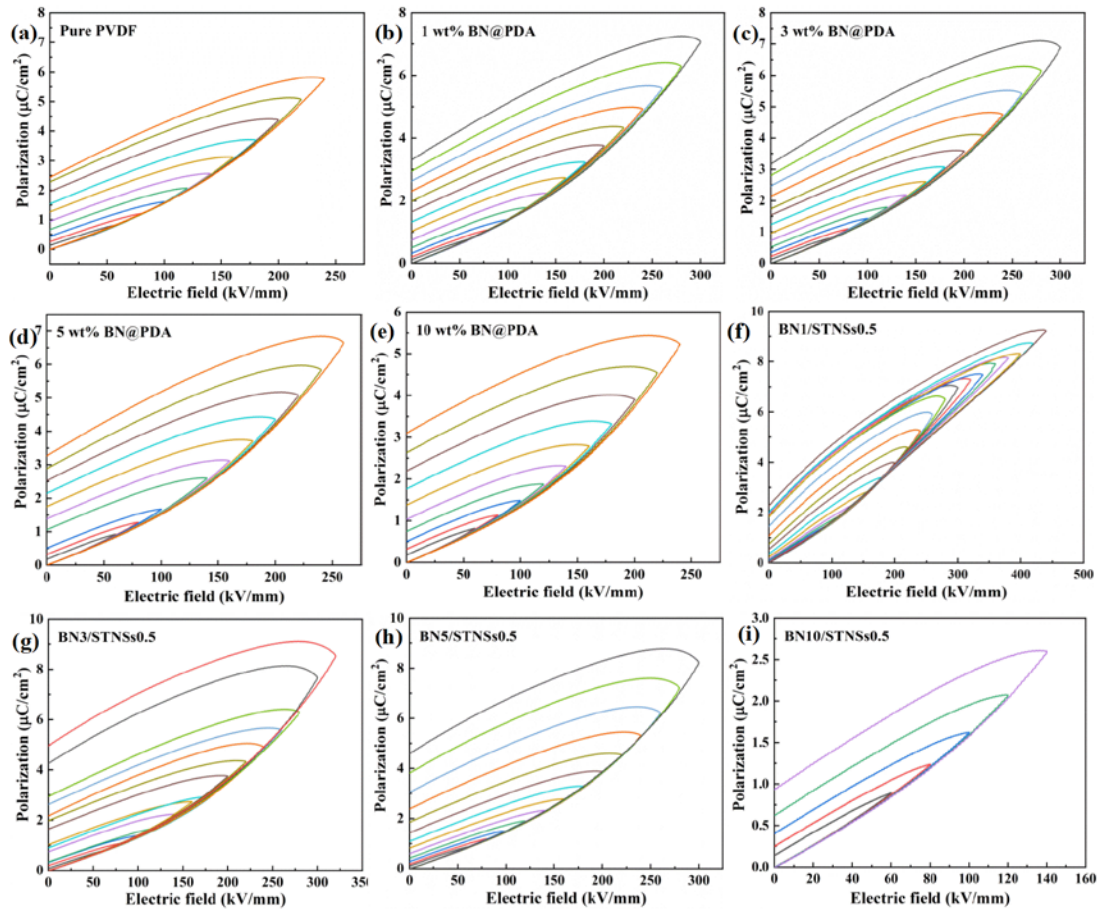

**Figure S15.** Hysteresis loops of pure PVDF, PVDF/BN@PDA and PVDF/BN@PDA-STNSs composites.



Table S1 DSC results and  $F(\beta)$  of the composites.

| Samples           | Contents | $T_m(^{\circ}\text{C})$ | $\Delta H_m(\text{J/g})$ | $X_c(\%)$ | $F(\beta)$ |
|-------------------|----------|-------------------------|--------------------------|-----------|------------|
| PVDF/BN@PDA       | 0 wt%    | 161.9                   | 43.7                     | 41.8      | 52.3       |
|                   | 1 wt%    | 162.6                   | 35.3                     | 35.6      | 59.9       |
|                   | 3 wt%    | 163.1                   | 35.0                     | 34.0      | 60.5       |
|                   | 5 wt%    | 162.6                   | 34.8                     | 33.5      | 60.3       |
|                   | 10 wt%   | 161.8                   | 28.9                     | 31.3      | 53.4       |
| PVDF/BN@PDA-STNSs | 1 wt%    | 167.2                   | 37.5                     | 35.9      | 60.5       |
|                   | 3 wt%    | 167.3                   | 38.2                     | 36.6      | 60.7       |
|                   | 5 wt%    | 167.5                   | 37.0                     | 35.4      | 60.3       |
|                   | 10 wt%   | 166.1                   | 33.2                     | 31.8      | 59.4       |
